# Supplementary material
Source: publisher figshare collection journal article supplement (https://acs.figshare.com/ndownloader/files/4630396)

# Quantitative Conformational Analysis of Partially Folded Proteins from Residual Dipolar Couplings : Application to the Molecular Recognition Element of Sendai Virus Nucleoprotein

*Malene Ringkjøbing Jensen, Klaartje Houben, Ewen Lescop, Laurence  
Blanchard, Rob W.H. Ruigrok and Martin Blackledge*

## Supporting Information

### Figure S1

Helical propensity determined on the basis of  $^{13}\text{C}_\alpha$  NMR secondary chemical shifts. The presence of secondary structure was estimated by subtracting random coil shifts.<sup>1</sup> Positive values indicate the presence of helical elements.

### Figure S2

Propensity of different amino acids to be in the N-capping position in folded structures derived from a database of high resolution crystallographic structures (ref 47 in manuscript).

---

<sup>1</sup> Wishart DS, Sykes BD (1994) The  $^{13}\text{C}$  chemical-shift index: a simple method for the identification of protein secondary structure using  $^{13}\text{C}$  chemical-shift data. *J. Biomol. NMR* 4 :171– 180.

Table S1 (Supporting Information)

| Helical conformers <sup>a</sup> (population) <sup>b</sup> | $\chi^2$ <sup>c</sup> |
|-----------------------------------------------------------|-----------------------|
| 476-487 (0.60)                                            | 662                   |
| 478-489 (0.60)                                            | 653                   |
| 479-487 (0.89)                                            | 621                   |
| 476-488 (0.52)                                            | 427                   |

| Helical conformers <sup>a</sup> (population) <sup>b</sup> | $\chi^2$ <sup>c</sup> |
|-----------------------------------------------------------|-----------------------|
| 476-484 (0.46)                                            | 265                   |
| 479-488 (0.45)                                            |                       |
| 476-488 (0.38)                                            | 259                   |
| 479-492 (0.17)                                            |                       |
| 476-488 (0.36)                                            | 253                   |
| 488-492 (0.15)                                            |                       |
| 476-488 (0.37)                                            | 227                   |
| 479-484 (0.45)                                            |                       |

| Helical conformers <sup>a</sup> (population) <sup>b</sup> | $\chi^2$ <sup>c</sup> |
|-----------------------------------------------------------|-----------------------|
| 476-488 (0.28)                                            | 138                   |
| 479-484 (0.30)                                            |                       |
| 478-483 (0.14)                                            |                       |
| 476-488 (0.27)                                            | 131                   |
| 479-484 (0.38)                                            |                       |
| 478-493 (0.10)                                            |                       |
| 476-488 (0.30)                                            | 124                   |
| 479-484 (0.37)                                            |                       |
| 478-495 (0.07)                                            |                       |
| 476-488 (0.28)                                            | 121                   |
| 479-484 (0.36)                                            |                       |
| 478-492 (0.11)                                            |                       |

Table S1 Data reproduction from ensembles with different numbers of helical conformers (top 4 data fits in each case)

- a - Range of the invoked helices.
- b - Population of the invoked helices. The remaining conformers are unfolded.
- c - Target function measured over all 100 RDCs.

Figure S1

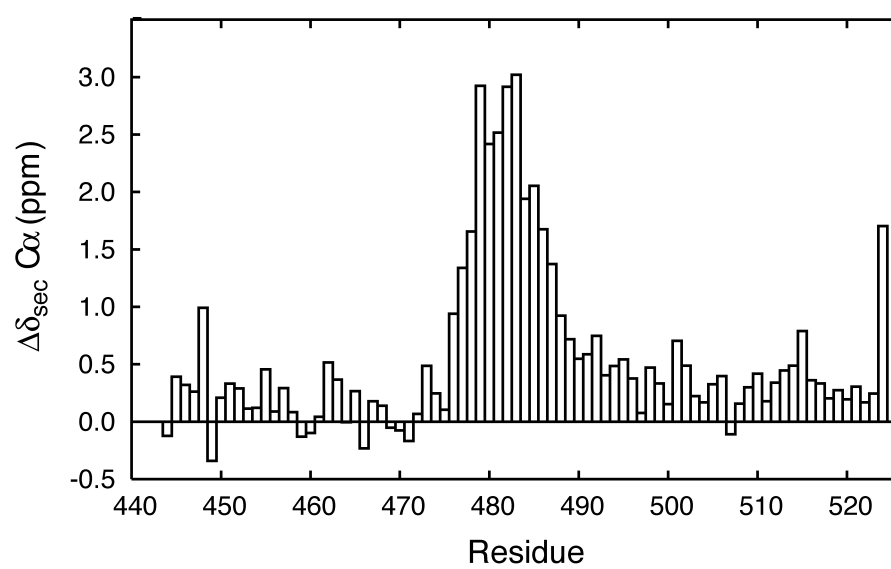

Figure S2

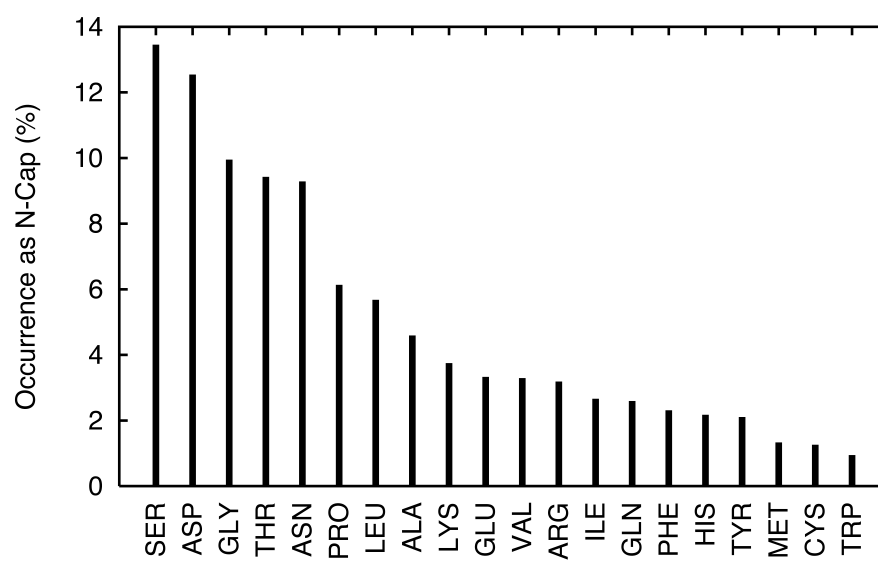

Supplement: Supplementary file 1 [file 4630396]
